# Supplementary material for: Change in Lipofectamine Carrier as a Tool to Fine-Tune Immunostimulation of Nucleic Acid Nanoparticles
Source: MDPI journal article supplement (doi:10.3390/molecules28114484), 2023-06-01
Supplement: s1 [file s1]

## Supplementary Information

**Title:**

**Change in lipofectamine carrier as a tool to fine-tune immunostimulation of nucleic acid nanoparticles**

**Hannah S. Newton<sup>1,+</sup>, Yasmine Radwan<sup>2,+</sup>, Jie Xu<sup>1</sup>, Jeffrey D. Clogston<sup>1</sup>, Marina A. Dobrovolskaia<sup>1,\*</sup> and Kirill A. Afonin<sup>2,\*</sup>**

1 Nanotechnology Characterization Laboratory, Cancer Research Technology Program, Frederick National Laboratory for Cancer Research sponsored by the National Cancer Institute, Frederick, MD 21701, USA

2 Nanoscale Science Program, Department of Chemistry, University of North Carolina Charlotte, Charlotte, NC 28223, USA

<sup>+</sup> - Authors contributed equally

<sup>\*</sup> - Correspondence: MAD: [marina@mail.nih.gov](mailto:marina@mail.nih.gov); KAA: [kafonin@uncc.edu](mailto:kafonin@uncc.edu)

## Sequences used in this project

### DNA Cubes

|    | Sequence                                             | #NTs | MW (g/mole) |
|----|------------------------------------------------------|------|-------------|
| 5' | GGCAACTTTGATCCCTCGGTTTAGCGCCGGCCTTTCTCCACACTTTCACG   | 52   | 15784.2     |
| 5' | GGGAAATTTCTGTTAGGTTTTGTTGCCGTGTTTCTACGATTACTTTGGTC   | 52   | 16074.4     |
| 5' | GGACATTTTCGAGACAGCATTTTTCCCGACCTTTCGGATTGTATTTAGG    | 52   | 15996.4     |
| 5' | GGCGCTTTTGACCTTCTGCTTTATGTCCCTATTTCTTAATGACTTTTGGCC  | 52   | 15825.2     |
| 5' | GGGAGATTTAGTCATTAAGTTTTACAATCCGCTTTGTAATCGTAGTTTGTGT | 52   | 16074.5     |
| 5' | GGGATCTTTACCTACCACGTTTTGCTGTCTCGTTTGCAGAAGGTCTTCCGA  | 52   | 15933.3     |

### RNA Cubes

|    | Sequence                                             | #NTs | MW (g/mole) |
|----|------------------------------------------------------|------|-------------|
| 5' | GGCAACUUUGAUCCUCGGUUUAGCGCCGGCCUUUUCUCCACACUUUCACG   | 52   | 16391.7     |
| 5' | GGGAAAUUUCGUGGUAGGUUUUGUUGCCCGUGUUUCUACGAUUACUUUGGUC | 52   | 16597.8     |
| 5' | GGACAUUUUCGAGACAGCAUUUUUCCCGACCUUUGCGGAUUGUAUUUUAGG  | 52   | 16547.8     |
| 5' | GGCGCUUUUGACCUUCUGCUUUUAGUCCCUAUUUUCUAAUGACUUUUGGCC  | 52   | 16334.6     |
| 5' | GGGAGAUUUAGUCAUUAAGUUUUACAACCGCUUUGUAUCGUAGUUUGUGU   | 52   | 16597.8     |
| 5' | GGGAUCUUUACCUACCACGUUUUGCUGUCUGUUUGCAGAAGGUCUUUCCGA  | 52   | 16498.8     |

### RNA Rings

|    | Sequence                                      | #NTs | MW (g/mole) |
|----|-----------------------------------------------|------|-------------|
| 5' | GGGAACCGUCCACUGGUUCCCGCUACGAGAGCCUGCCUCGUAGC  | 44   | 14062.5     |
| 5' | GGGAACCGCAGGCUUGGUUCCCGCUACGAGAGAACGCCUCGUAGC | 44   | 14188.6     |
| 5' | GGGAACCGCGUUCUGGUUCCCGCUACGAGACGUCUCCUCGUAGC  | 44   | 14040.4     |
| 5' | GGGAACCGAGACGUGGUUCCCGCUACGAGUCGUGGUCUCGUAGC  | 44   | 14183.5     |
| 5' | GGGAACCACACGAGGUUCCCGCUACGAGAACCAUCCUCGUAGC   | 44   | 14076.5     |
| 5' | GGGAACCGAUGGUUGGUUCCCGCUACGAGAGUGGACCUCGUAGC  | 44   | 14207.5     |

### RNA Fibers

|    | Sequence                                        | Strand | #NTs | MW (g/mole) |
|----|-------------------------------------------------|--------|------|-------------|
| 5' | GGGAAUCCAAGGAGGCAGGAUUCGUCACAGAAGGAGGCACUGUGAC  | 1      | 48   | 15609.5     |
| 5' | GGGAACGUAAGCCUCCAACGUUCCCGAUGCUAAGCCUCCAAGCAUCC | HIV 2  | 48   | 15323.3     |

### AF488-DNA cubes

|    | Sequence                                                                         | #NTs | MW      |
|----|----------------------------------------------------------------------------------|------|---------|
| 5' | GGCAACTTTGATCCCTCGGTTTAGCGCCGGCCTTTCTCCACACTTTCACG                               | 52   | 15784.2 |
| 5' | GGGAAATTTCTGTTAGGTTTTGTTGCCGTGTTTCTACGATTACTTTGGTC                               | 52   | 16074.4 |
| 5' | GGACATTTTCGAGACAGCATTTTTCCCGACCTTTCGGATTGTATTTAGG                                | 52   | 15996.4 |
| 5' | GGCGCTTTTGACCTTCTGCTTTATGTCCCTATTTCTTAATGACTTTTGGCC /3A <sub>lex</sub> F488N/-3' | 52   | 16552.9 |
| 5' | GGGAGATTTAGTCATTAAGTTTTACAATCCGCTTTGTAATCGTAGTTTGTGT                             | 52   | 16074.5 |
| 5' | GGGATCTTTACCTACCACGTTTTGCTGTCTCGTTTGCAGAAGGTCTTCCGA                              | 52   | 15933.3 |

### AF488-RNA cubes

|    | Sequence                                                                         | #NTs | MW (g/mole) |
|----|----------------------------------------------------------------------------------|------|-------------|
| 5' | GGCAACUUUGAUCCUCGGUUUAGCGCCGGCCUUUUCUCCACACUUUCACG                               | 52   | 16391.7     |
| 5' | GGGAAAUUUCGUGGUAGGUUUUGUUGCCCGUGUUUCUACGAUUACUUUGGUC                             | 52   | 16597.8     |
| 5' | GGACAUUUUCGAGACAGCAUUUUUCCCGACCUUUGCGGAUUGUAUUUUAGG                              | 52   | 16547.8     |
| 5' | GGCGCUUUUGACCUUCUGCUUUUAGUCCCUAUUUUCUAAUGACUUUUGGCC /3A <sub>lex</sub> F488N/-3' | 52   | 17062.2     |
| 5' | GGGAGAUUUAGUCAUUAAGUUUUACAACCGCUUUGUAUCGUAGUUUGUGU                               | 52   | 16597.8     |
| 5' | GGGAUCUUUACCUACCACGUUUUGCUGUCUGUUUGCAGAAGGUCUUUCCGA                              | 52   | 16498.8     |

### AF488-RNA rings

|    | SEQUENCE                                                                 | #NTs | MW (g/mole) |
|----|--------------------------------------------------------------------------|------|-------------|
| 5' | GGGAACCGUCCACUGGUUCCCGCUACGAGAGCCUGCCUCGUAGC                             | 44   | 14062.5     |
| 5' | GGGAACCGCAGGCUUGGUUCCCGCUACGAGAGAACGCCUCGUAGC                            | 44   | 14188.6     |
| 5' | GGGAACCGCGUUCUGGUUCCCGCUACGAGACGUCUCCUCGUAGC/3A <sub>lex</sub> F488N/-3' | 44   | 14768.0     |

|    |                                              |    |         |
|----|----------------------------------------------|----|---------|
| 5' | GGGAACCGAGACGUGGUUCCCGCUACGAGUCGUGGUCUCGUAGC | 44 | 14183.5 |
| 5' | GGGAACCACCACGAGGUUCCCGCUACGAGAACCAUCCUCGUAGC | 44 | 14076.5 |
| 5' | GGGAACCGAUGGUUGGUUCCCGCUACGAGAGUGGACCUCGUAGC | 44 | 14207.5 |

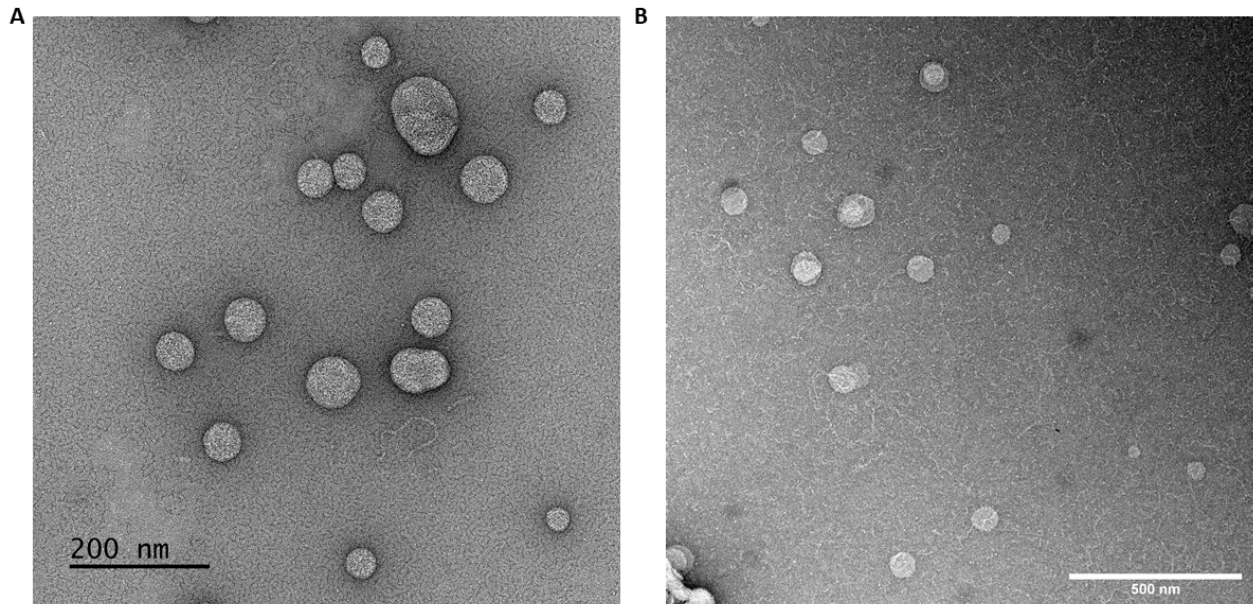

**Figure S1. Comparison of lipofectamine 2000 (L2K) morphology by TEM performed using different grids.** (A) L2K was deposited on a carbon-coated 400 mesh Cu/Rh grid and stained with 1% Uranyl Acetate from Polysciences, Warrington, PA, USA; the images were obtained using FEI Talos L120C TEM with Gatan 4k x 4k OneView camera. (B) L2K was deposited on a glow-discharged carbon-coated 200 mesh Cu grid and stained using 1% Uranyl Acetate from EMS, Hatfield, PA, USA; the images were obtained using FEI Tecnai T20 transmission electron microscope operating at 200 kV with a Gatan 2k X 2k Eagle camera. Other details of sample preparation were the same for image A and B as described in materials and methods.
